# Supplementary material for: An ARC-Regulated IL1β/Cox-2/PGE2/β-Catenin/ARC Circuit Controls Leukemia–Microenvironment Interactions and Confers Drug Resistance in AML
Source: Oxford University Press journal article supplement (doi:10.1158/0008-5472.can-18-0921), 2019-01-23
Supplement: 00085472can180921-sup-199208_3_supp_5270929_pl4n43.docx [file 00085472can180921-sup-199208_3_supp_5270929_pl4n43.docx]

**Supplemental Data**

Supplemental Table 1. Primers used to construct ARC promoter-GFP reporter lentiviral vectors

| Cla ArcPro forward: AGAGAGATCGATACTACATTGGGGTTGCACTATGGT |
| --- |
| Nhe ArcPro reverse: CTCTCTCGCTAGCAGTGCATCCAATGCCTCGTACTCTGG |
| Nhe copGFP forward: aattgctagccaccATGGAGAGCGACGAGAGCG |
| Bam copGFP reverse: TATGGATCCTTAGCGAGATCCGGTGGAGCCGGG |
| LEF-Pml forward: GGGAGGCTCTCAGCACcacGTGCTCTGGGTTCAGAGG |
| LEF-Pml reverse: CCTCTGAACCCAGAGCACGTGGTGCTGAGAGCCTCCC |
| LEF-Sal forward: CCTGGGTTCTGCAGGGtCgAcGCAGGAGGCAGAAGGC |
| LEF-Sal reverse: GCCTTCTGCCTCCTGCGTCGACCCTGCAGAACCCAGG |

Supplemental Table 2. Antibody panel for CyTOF analysis

|  | Target | Label | Clone | Vendor |
| --- | --- | --- | --- | --- |
| 1) | CD45 | 154Sm or 89Y | HI30 | DVS‐Fluidigm |
| 2) | CD34 | 148Nd | 4H11 | eBioscience |
| 3) | CD38 | 168Er | HIT2 | BioLegend |
| 4) | CD123 | 151Eu or 145Nd | 7G3 | BD Biosciences |
| 5) | TIM-3 | 156Gd | F38-2E2 | BioLegend |
| 6) | CD90 | 171Yb | 5E10 | BioLegend |
| 7) | CD11b | 144Nd | ICRF44 | DVS-Fluidigm |
| 8) | ARC | 170Er | F-11 | Santa Cruz |
| 9) | β-catenin | 147Sm | D10A8 | DVS-Fluidigm |

**Supplemental Figure 1**. Expression of ARC and -catenin in bone marrow (BM) human CD45+ cells of mice harboring control or ARC KD OCI-AML3 cells with or without Ara-C treatment, determined by Opal/TSA multiplex immunohistochemistry staining and Vectra multispectral imaging analysis. Left, human CD45 (yellow), ARC (red), -catenin (cyan), DAPI (blue), and merged imaging (objective lens ×20, scale bar 50 µm). Fluorophores for CD45, ARC, and -catenin are Opal 540, Opal 570 and Opal 650, respectively. Right, the quantitation of ARC and -catenin protein expression in human CD45+ cells of mouse BM: 16 fields in control cell-injected mice (4,574 to 8,888 cells/field, total 106,893 cells), 11 fields in control cell-injected mice with Ara-C treatment (28 to 4,911 cells/field, total 22,288 cells), 16 fields in ARC KD cell-injected mice (1,895 to 6,265 cells/fields, total 62,193 cells), and 12 fields in ARC KD cell-injected mice with Ara-C treatment (1,327 to 5,857 cells/field, total 36,243 cells); respectively.
